# Supplementary material for: Structure and mechanism of the PilF DNA transformation ATPase from Thermus thermophilus
Source: PubMed Central journal article supplement — Biochem J. 2013 Feb 15;450(Pt 2):417–25. doi: 10.1042/BJ20121599 (PMC3583032; doi:10.1042/bj20121599), 2013-02-15
Supplement: bj4500417add.pdf [file bj4500417add.pdf]

## SUPPLEMENTARY ONLINE DATA

# Structure and mechanism of the PiIF DNA transformation ATPase from *Thermus thermophilus*

Richard F. COLLINS, Darin HASSAN, Vijaykumar KARUPPIAH, Angela THISTLETHWAITE and Jeremy P. DERRICK<sup>1</sup>

Faculty of Life Sciences, The University of Manchester, Oxford Road, Manchester M13 9PT, U.K.

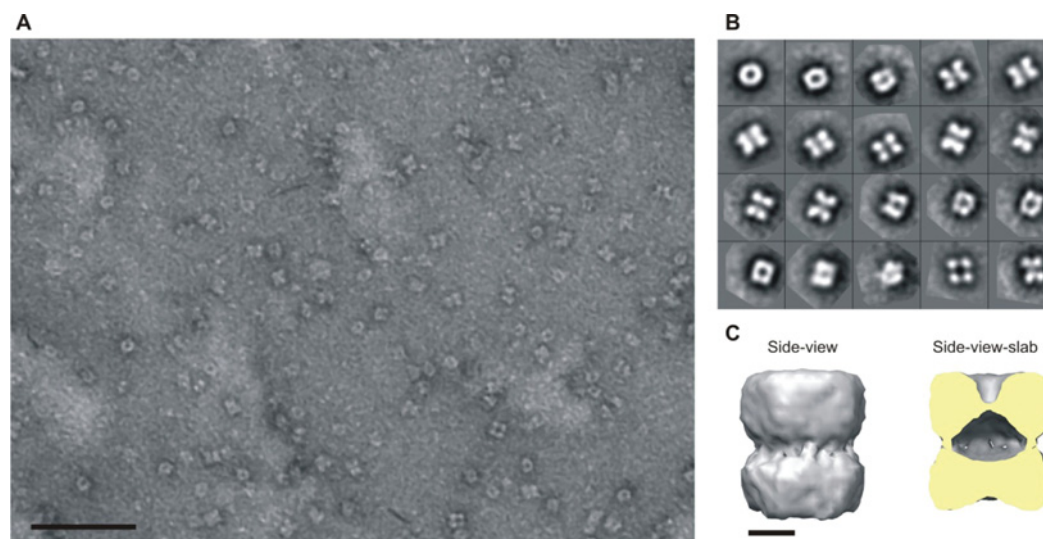

**Figure S1** TtPiIF raw data and reconstruction from negative stain

Examination of negatively stained TtPiIF apoprotein by TEM. **(A)** A sample field of TEM data. Scale bar = 1000 Å. **(B)** Examples of SVD/MSA projection averages produced from the raw data. Box size = 240 Å × 240 Å. **(C)** Surface-rendered side views of the TtPiIF complex (orthogonal views). The slab view has the foremost 50% of volume removed to display protein density through the complex. Scale bar = 50 Å.

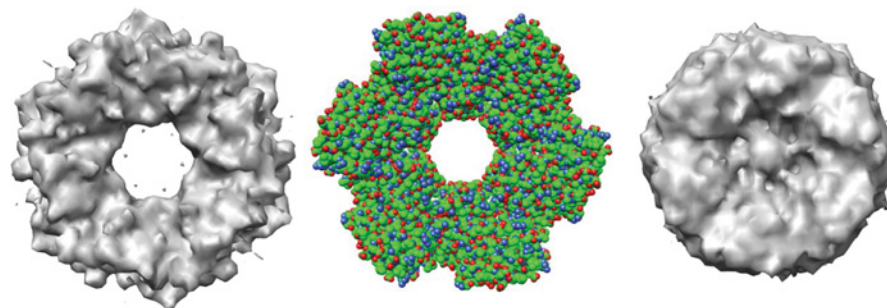

**Figure S2** Comparison of top views of the ring (left-hand panel) and disk (right-hand panel) features from the cryoelectron density map with the atomic model of the C-terminal region of TtPiIF (centre panel)

The p[NH]ppA-bound forms of the cryoelectron density map are shown. The original model of the C-terminal region of TtPiIF is shown, before refinement against the density map.

Received 18 October 2012/19 December 2012; accepted 20 December 2012  
Published as BJ Immediate Publication 20 December 2012, doi:10.1042/BJ20121599

<sup>1</sup> To whom correspondence should be addressed (email jeremy.derrick@manchester.ac.uk).

The density maps reported in the present paper will appear in the Electron Microscopy Data Bank under accession numbers 2222 and 2223.
